# Supplementary material
Source: publisher site journal article supplement (https://www.spandidos-publications.com/8526/downloadSupplementary)
Supplement: Supplementary file 1 [file downloadSupplementary]

## Sheet: Sizes-CNV
Table SIII. Number of CNV by length (Kbp).
Samples	Tissue	Type	Kbp						Total
			1-50	51 - 100	101 - 200	201 - 500	501 - 1000	>1000
AII patients by tissue-type	LEU	Loss	0	0	5	3	2	1	11
	LEU	Gain	0	0	9	11	4	1	25
	ADJ	Loss	0	0	161	124	32	16	333
	ADJ	Gain	0	0	261	282	108	97	748
	TUM	Loss	419	15	1148	899	281	149	2911
	TUM	Gain	344	11	871	930	395	347	2898
≥ 3 patients	LEU	Loss	0	0	0	2	2	0	4
	LEU	Gain	0	0	0	1	3	0	4
	ADJ	Loss	0	0	0	1	0	0	1
	ADJ	Gain	0	0	22	31	12	7	72
	TUM	Loss	0	0	84	67	53	46	250
	TUM	Gain	0	0	89	163	76	119	447
